# Supplementary material
Source: PubMed Central journal article supplement (PMC428456)

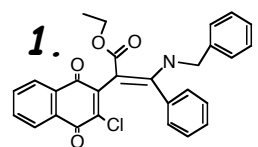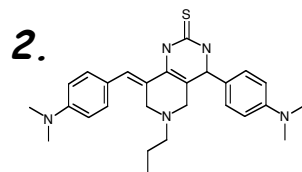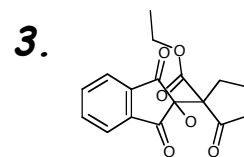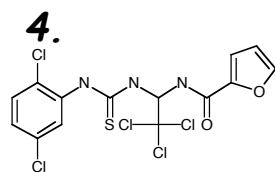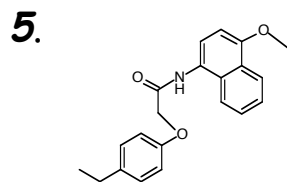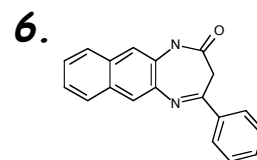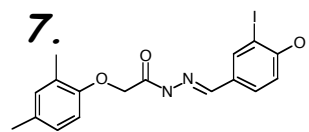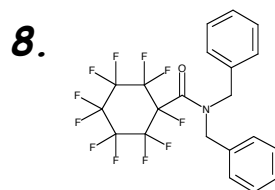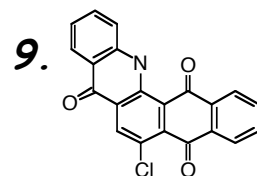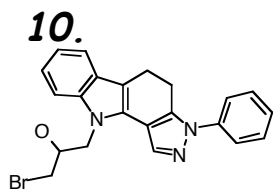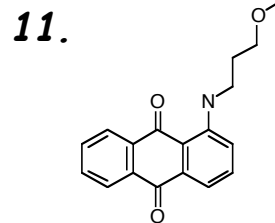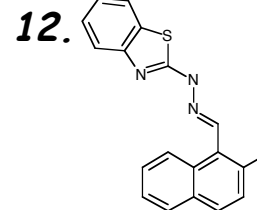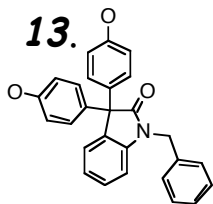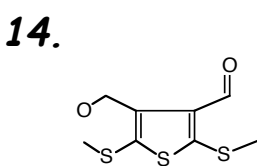

Supplement: pnas_101_24_8969__2.pdf [file pnas_101_24_8969__2.pdf]

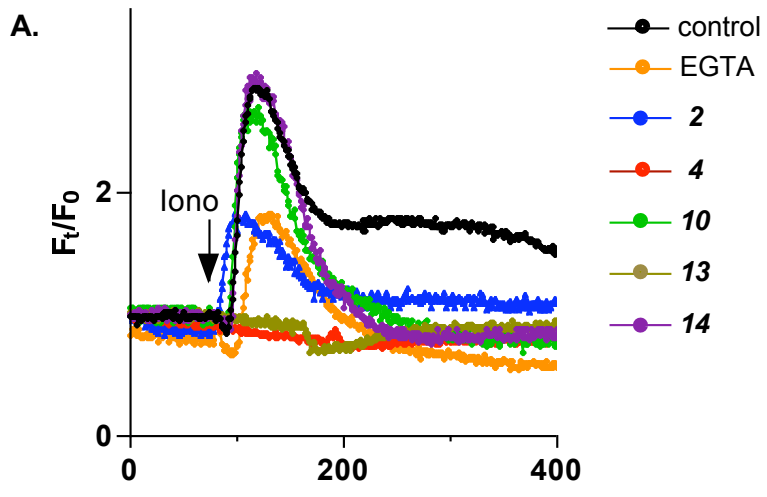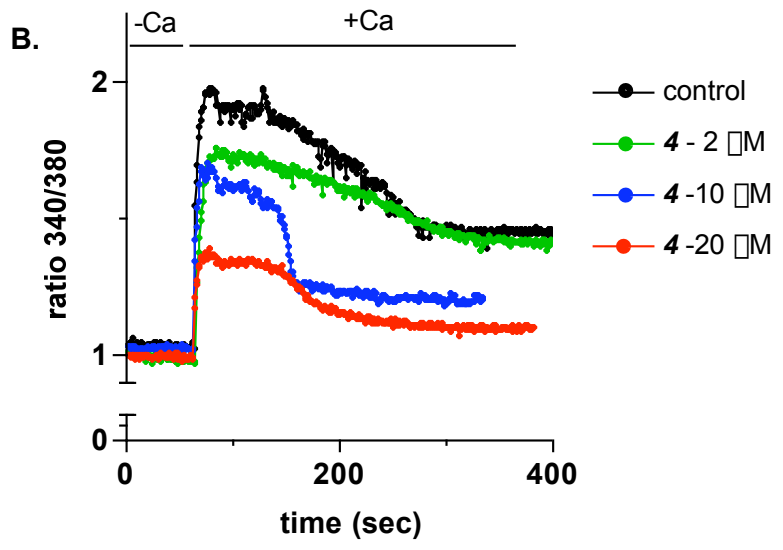

Supplement: pnas_101_24_8969__3.pdf [file pnas_101_24_8969__3.pdf]

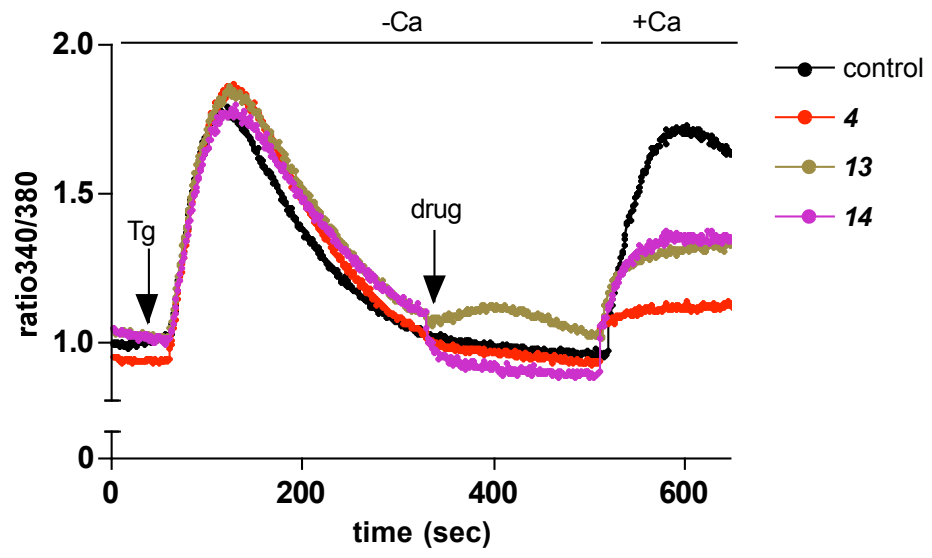

Supplement: pnas_101_24_8969__4.pdf [file pnas_101_24_8969__4.pdf]

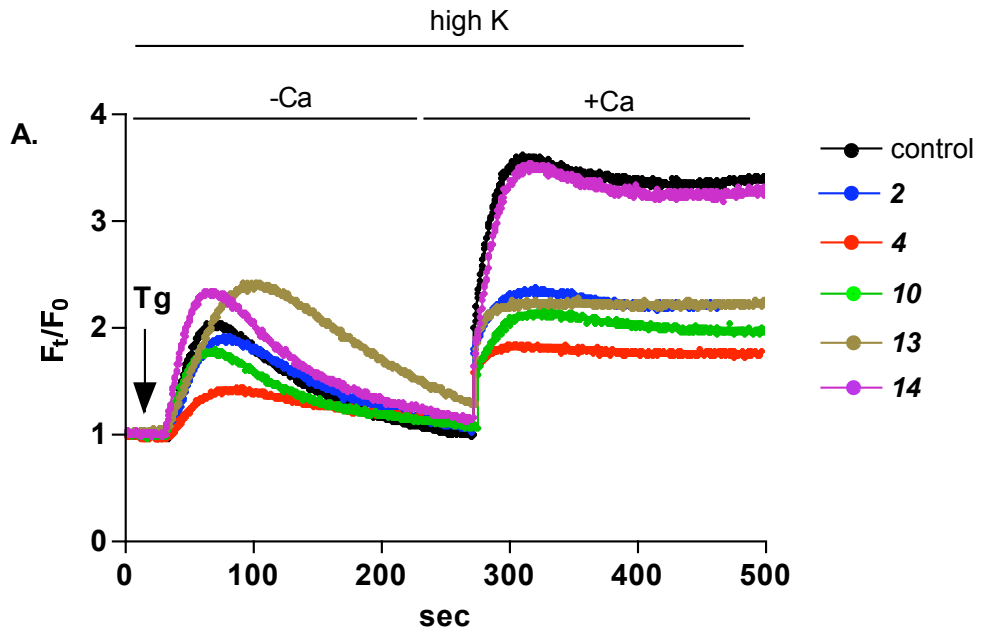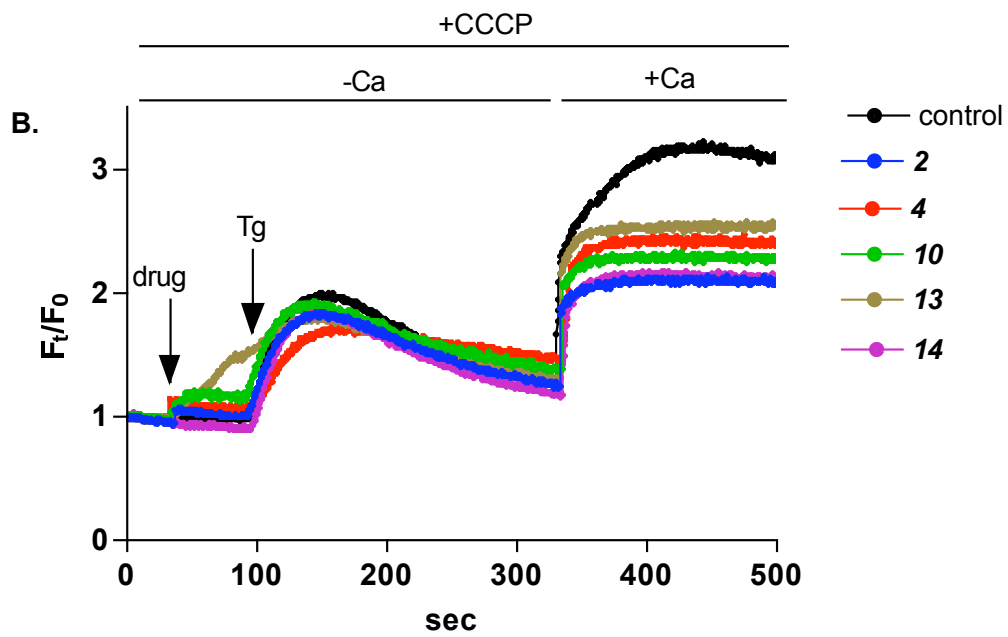

Supplement: pnas_101_24_8969__5.pdf [file pnas_101_24_8969__5.pdf]

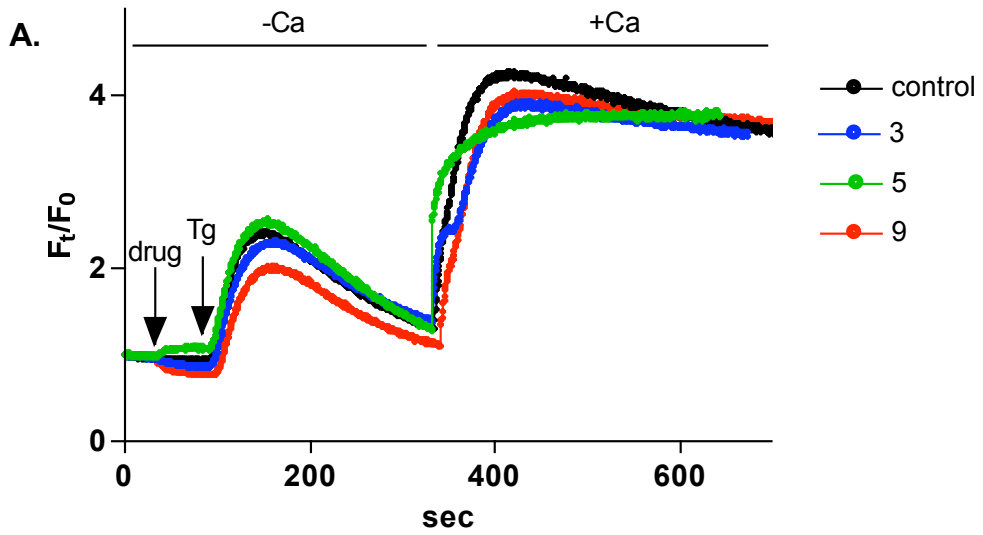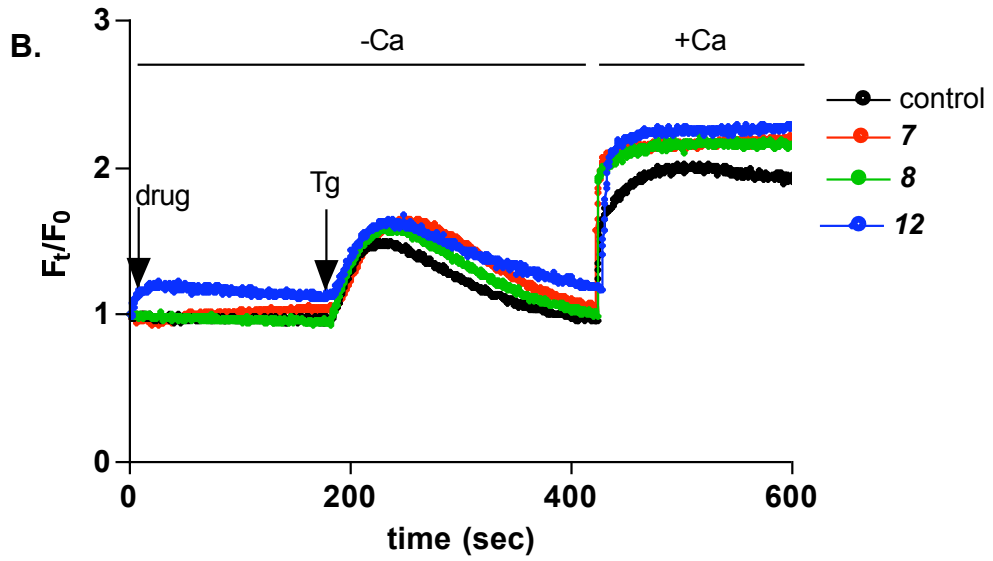

Supplement: pnas_101_24_8969__6.pdf [file pnas_101_24_8969__6.pdf]
